# Supplementary material for: Carmustine as a Supplementary Therapeutic Option for Glioblastoma: A Systematic Review and Meta-Analysis
Source: PubMed Central journal article supplement (PMC7527463; doi:10.3389/fneur.2020.01036), 2020-09-17

**Supplementary Fig. 1** Hazard ratios and 95% confidence intervals of the occurrence of adverse events in GBM patients with carmustine wafer administration. CI: confidence interval, df: degrees of freedom, SE: standard error

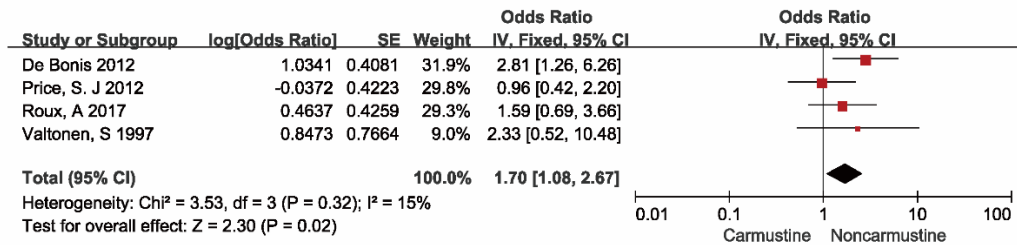

**Supplementary Fig. 2** Funnel plot of publication bias: Each dot represents individual studies. SE: standard error

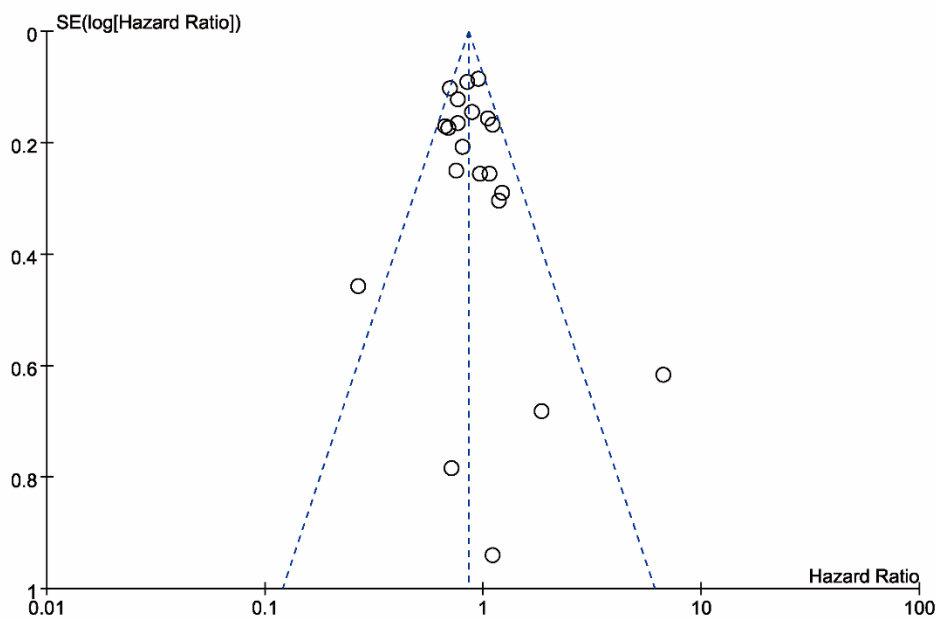

**Supplementary Fig. 3** Hazard ratios and 95% confidence intervals of the comparison of overall survival between GBM patients with temozolomide and carmustine treatment. CI: confidence interval, df: degrees of freedom, SE: standard error

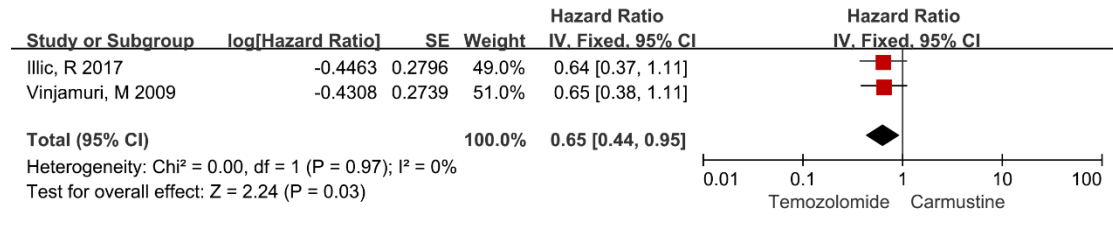

Supplement: Data_Sheet_1.pdf [file Data_Sheet_1.pdf]
